# Supplementary material
Source: publisher site journal article supplement (https://www.dovepress.com/get_supplementary_file.php?f=301127.docx)
Supplement: Supplementary file 1 [file get_supplementary_file.php]

**Table S1. Clinical characteristics of patients with TC in GEO.**

| **Variables** | **GSE29265** | **GSE33630** | **GSE60542** | **GSE65144** |
| --- | --- | --- | --- | --- |
| Public date | Jun 01, 2012 | Nov 09, 2012 | Sep 01, 2015 | Jan 22, 2015 |
| Country | Belgium | Belgium | Belgium | USA |
| Platform | GPL570 | GPL570 | GPL570 | GPL570 |
| Sample size, No | 49 | 105 | 67 | 25 |
| Patient size, No | 29 | 60 | 36 | 12 |
| Gender, No(%) |  | NA |  | NA |
| Male | 18(36.7) |  | 26(38.8) |  |
| Female | 22(44.9) |  | 41(61.2) |  |
| NA | 9(18.4) |  |  |  |
| Age at diagnosis, Median (Range) | 31.5(16-68) | NA | NA | NA |
| Type |  |  |  |  |
| Papillary thyroid carcinoma | 20 | 49 | 24 | 0 |
| Anaplastic thyroid carcinoma | 9 | 11 | 0 | 12 |
| Race/Country | Belgium | Belgium | Belgium | USA |

**Table S2. The 1184 EMT-related genes obtained from the EMT gene database**

| **EMT-related genes** |
| --- |
| TGFB1, SNAI1, ZEB1, CDH1, TWIST1, CTNNB1, STAT3, SNAI2, HIF1A, AKT1, MIR200C, ZEB2, SMAD3, EGFR, MIR200B, SMAD2, MIR200A, NOTCH1, MIR21, ILK, GSK3B, NFKB1, IL6, HMGA2, CXCR4, TP53, EGF, MTDH, MAPK1, CD44, BMI1, PTEN, MTOR, VIM, RAC1, MMP9, MMP2, GLI1, MET, SMAD4, KLF4, WNT5A, MYC, SMAD7, SIRT1, CTGF, CCR7, PROM1, TGFB2, PIK3CA, MIR34A, RHOA, AR, CD274, FOXM1, YAP1, SRC, MIR30A, MIR205, MALAT1, JAK2, WWTR1, CDH2, TNF, CXCL12, RELA, MAPK3, MIR221, MIR145, CXCL8, HGF, FN1, TWIST2, TP63, NANOG, VEGFA, SP1, S100A4, PTK2, MAPK7, MUC1, HMGB1, EZH2, ESR1, HOTAIR, CAV1, SOX2, BMP7, BMP4, SHH, PTGS2, POU5F1, PRRX1, KRAS, ID1, H19, FGFR1, POSTN, FOXQ1, MTA1, GRHL2, TRPS1, ADAM17, T, AURKA, BMP2, CCL18, CCL2, ROCK1, MIR429, ESRP1, PPARG, NTRK2, EPCAM, MIR93, MIR204, MIR203A, MIR186, MIR155, MIR148A, LOXL2, LGALS1, JUN, ITGB1, HDAC1, GREM1, KDM1A, AGER, NUMB, WNT1, EZR, TLR4, TCF3, STK11, UCA1, CCL21, CCL20, LEF1, PAX2, DDR2, YBX1, MCAM, MIR26B, MIR23A, MIR214, MIR19A, MIR150, MIR141, MIR124-1, MIR101-1, LOX, LCN2, IL17A, IL1B, IGF1R, IGF1, HSF1, HNF4A, FOXA1, FOXC2, ERBB2, EGR1, KLF8, NES, LINC-ROR, MIR300, NUAK1, DCLK1, CLDN1, RUNX2, TET1, TP73, THBD, TGM2, TGFBR3, TGFBR2, TGFB3, STIM1, SRF, BRCA1, SPARC, SOX9, SOX4, FSCN1, SIX1, SDC1, SATB1, BCL2L1, OVOL2, MKL1, NDRG2, EIF5A2, PARD3, PRKCI, AXL, FBXW7, TRIM33, PAK1, OSM, ROR2, NOTCH2, MSX2, MMP14, MIR9-1, MIR30C2, MIR30C1, MIR29C, MIR29B1, MIR26A1, MIR137, MIR130B, MIR10B, MIR106B, MIR106A, MIRLET7A1, LEP, L1CAM, RHOC, CYR61, BIRC5, HSPA5, HOXA13, ANXA2, PDCD4, GATA3, ALK, FLOT2, FOXO3, FOXC1, FGFR2, FGF2, AKT2, EPAS1, DNMT1, DAB2, CUX1, CTNND1, CTBP1, MAPK14, NLRP3, CYTOR, AGR2, NDRG1, CDKN1B, CD24, TNFSF15, GDF15, TP53INP1, TM4SF5, WNT3A, WISP2, NRP1, ACTL6A, CUL4A, FZD7, FOSL1, ADAM12, PDGFD, VASH2, TBL1XR1, TNFAIP8L2, YWHAG, YY1, XBP1, WT1, VDR, CCR2, MIR655, NR2C2, TIMP2, TGFBR1, TGFA, TERT, MIR630, MIR590, TCF4, BSG, SPRR2A, SPP1, SKIL, SMURF2, SFRP2, CXCL5, CCL5, BDNF, BCL2, RB1, PTPN11, MIR491, MIR485, CEMIP, SALL4, TMPRSS4, MAPK8, PRKCA, MEG3, TUG1, SEMA4C, PIN1, PGF, SERPINF1, GOLM1, PAWR, MIR375, MIR361, NODAL, ATM, MUC4, MMP7, FOXO4, MAP3K4, MAP3K3, MDM2, MIR96, MIR31, MIR222, MIR218-1, MIR181A1, MIR194-1, MIR185, MIR182, MIR181A2, MIR17, MIR143, MIR130A, MIR128-1, MIR10A, JUNB, ITGA5, IGFBP7, HSPB1, HSPA4, HOXB7, FOXA2, HMOX1, HDGF, HAS2, SENP1, RGCC, NEAT1, GPC3, USP22, FOXO1, DKK1, EFEMP1, VWCE, F2R, ELF5, EPHA2, EDN1, JAG1, DLX2, CTSL, PARP1, CRKL, FERMT2, TXNIP, SPRY2, ADAM10, TRIM28, NAMPT, MIR1271, HDAC6, ZBTB33, CDC42, HS3ST3B1, SETDB1, HDAC4, UBE3C, BAG3, MAGED1, CD36, ABCG2, NTN1, ADIPOQ, RNF8, ACVR1, CCNA2, SQSTM1, SPHK1, HDAC3, WISP3, NRP2, RUNX3, STC2, RUNX1, TNFSF11, BHLHE40, LGR5, HAVCR2, AFAP1L2, DYRK2, PITPNM3, AXIN2, AXIN1, NCOA3, ACTN4, ESRP2, PEAK1, CA9, YWHAZ, KDM6A, TUFT1, TPBG, TP53BP2, TLE1, TIMP1, TIAM1, TGFB1I1, TEAD1, TCF21, MIR616, MIR612, MAP3K7, STAT5B, STAT5A, STAT1, BRAF, SRI, SPOCK1, SOX5, BMP6, SKP2, SIM2, SDC2, CCL19, CEACAM1, RPS6KB1, ALX4, RNH1, CCND1, KDM5A, ACTA2, RAF1, PTX3, CIP2A, MTA3, MIR506, MIR497, MIR494, MIR489, PTHLH, PBXIP1, PAK5, CTNNBIP1, KLK6, PRSS8, PROP1, MAP2K1, ERBIN, BTBD7, PRKAA1, TRIM62, RNF111, IL17RD, PLAUR, PKD1, CDK14, PFN2, SUFU, IL23A, MAGEC2, HOOK1, PDCD1, CRIM1, EGFL7, PCBP1, F11R, SERPINE1, FURIN, PEBP1, P2RY2, NFKBIA, NF1, NCL, CEACAM6, MIR196B, MIR373, MIR135B, ZFAS1, MMP3, MMP1, ASCL1, MGAT3, MDK, MCL1, MIR34C, MIR33A, MIR30D, MIR301A, MIR27A, MIR24-1, MIR224, MIR223, MIR218-2, MIR206, MIR20A, MIR199A1, MIR193A, MIR191, MIR187, MIR183, MIR16-1, MIR15B, MIR15A, MIR153-1, MIR146A, MIR135A1, MIR134, MIR132, MIR124-3, MIR124-2, MIR122, MIR101-2, MIR100, LMNA, LGALS3, LASP1, LAMA5, KIT, CD82, JARID2, ITGB4, ITGA3, ITGA2, AQP5, AQP3, IL11, CXCR2, MACC1, TNC, HES1, PRMT1, HRAS, HOXB9, HOXA10, HMGB3, HIC1, HDAC2, H2AFX, GSN, UHRF1, CPS1-IT1, HIPK2, GRN, GPR32, ANG, GLI2, GJB1, NOX1, LRIG1, SLC39A6, FZD2, FUT4, BRD4, SIRT3, DICER1, SATB2, BOP1, EPB41L3, KDM4B, FGF9, FGF1, ETV4, ESRRA, ESR2, ERG, EPS8, EPO, EPHB2, GKN2, TET3, AHR, E2F1, HBEGF, DLX4, DAB2IP, PAQR3, CTSZ, GLIPR2, SLC30A7, RBFOX3, CSNK2B, CRYAB, LINC00261, CRK, CREB1, CLDN7, CLDN4, CLU, UHRF2, EHMT2, PROKR1, WASF3, CFTR, KHDRBS1, TRIM16, CEBPB, CEBPA, HOXB13, TACC3, CDX2, FAM3C, CDKN2A, CDK5, NPTN-IT1, SPRY4-IT1, ZEB2-AS1, MIR1236, MIR675, FGF19, RBM8A, MRC2, GAB2, CD151, HDAC9, SEMA3E, VGLL4, CD63, MICAL2, ISG15, PITPNM1, CXCL14, ONECUT2, ROCK2, RASAL2, EIF2AK3, MAP4K4, QKI, HAND1, CYP7B1, MUC16, FOXP2, ZFYVE9, SLC9A3R1, KL, LHX2, IGSF8, NREP, CD14, NOG, LRRFIP1, MARVELD3, ARHGEF2, SMC3, LATS1, NMI, AOC4P, PSTPIP1, SOCS3, HS6ST2, CCNG2, CDKL2, BTRC, CCND2, TIMELESS, NR1I2, KAT2B, INPP4B, SCEL, TNFRSF11A, TNFSF10, TNFSF12, CBR1, EED, ABCC3, CBLB, EIF3I, IRS2, SCIN, IKBKG, PIK3R3, AJUBA, PPM1D, GEMIN2, USMG5, SEMA7A, LOXL3, HINT2, SPZ1, TEAD2, FOXN1, CUL3, KAT8, SPOP, MARVELD1, ITCH, YPEL3, CAPZA1, CAPNS1, SMC1A, USP9X, VANGL1, TRIM11, WNT5B, IFT88, SETD7, PTP4A2, MED28, ELL3, NUBPL, FBXO11, MICALL2, LIN28A, TRPM8, DDR1, ZYX, ZNF217, PCGF2, ZNF143, MIR802, MIR454, MZF1, ZFP36, WNT11, WNT6, VTN, VSNL1, VHL, VCP, UCP2, UCHL3, TYRO3, TYMS, TXN, TUFM, C5AR1, PHLDA2, TSC2, TSC1, MIR663A, TRPC5, ACTG2, TP53BP1, TNXB, TNS1, TLN1, TLE4, TJP1, TIMP3, NR2F2, TFCP2, TDGF1, MIR92B, MIR646, MIR639, MIR638, TCF7, MIR573, TBX3, TBX2, TAZ, KLF5, ST14, SREBF1, SOX3, SON, SOD2, MIR487B, STK33, SLIT3, SLC2A1, SKP1, SKI, ST8SIA1, ST6GAL1, SIAH2, SIAH1, SHC1, CPEB1, AKTIP, SFTPC, SOX17, SEMA4A, ELSPBP1, GOLPH3, CX3CL1, CCL25, CCL22, CCL3, SERPINB4, ATXN1, SALL1, S100P, S100A9, S100A8, S100A6, S100A2, ROS1, RORC, EXOC4, BCL6, RGS3, RDX, HAS2-AS1, RBP2, SENP2, NTN4, RASA1, PRUNE1, CXCL16, PTPRZ1, NKX3-2, PTPN14, PTPN6, SCUBE2, EPB41L5, PTN, STIM2, MTUS1, MKL2, MIR522, MIR517C, MIR520G, MIR452, RAB22A, CAMK1D, TBX20, POGLUT1, PROX1, AJAP1, PRKCQ, HDAC8, PAG1, KDM3A, FOXJ2, PRKCE, PRKAA2, FERMT1, MIR449A, LGR4, BRF2, IMP3, PTPA, PPP1R8, GIPC2, POMC, ERRFI1, MBD3, PLS3, PLAGL2, PLA2G4A, PIK3R1, SERPINI1, ABCB1, STK26, WWOX, UIMC1, CYB5R1, PDGFRB, ACKR4, PDGFB, LIMA1, PRRX2, PDE4A, UBR5, PLAC8, TFDP3, PCSK1, ING4, ANGPTL4, PCMT1, GMNN, PCDH9, PBX3, PARD6A, NEUROG3, IL22, PRDX1, DUXAP9, OPRM1, MIR424, MIR382, MIR381, NUCB2, ROR1, NTRK3, NPPA, NOV, NOTCH4, NOTCH3, NME1, NKX6-1, NFIL3, NFIC, MYL2, MYD88, MYCN, MYBL2, MYB, TRIM37, MUC2, MST1R, MSN, MIR345, MIR331, MIR326, MMP19, MMP13, MMP11, MMP8, MLLT3, ASCL2, MITF, CXCL9, MEF2D, MDM4, ART1, SMAD9, ARRB1, MIR7-1, MIR30E, MIR30B, MIR302A, MIR29A, MIR26A2, MIR25, MIR24-2, MIR23B, MIR217, MIR216A, MIR211, MIR208A, MIR199A2, MIR190A, MIR181B1, MIR153-2, MIR152, MIR149, MIR144, MIR136, MIR129-1, MIR125B1, MIRLET7G, MIRLET7D, MIRLET7B, LYN, LTBP1, LRP6, LMNB1, LIMS1, LIF, LGALS9, LAMC2, USP17L9P, RHOG, NANOGP8, KRT19, RHOB, KMT5A, KRT18, KRT17, KRT8, KRT7, KIF5B, KDR, KCNN4, KCNH1, JAK3, JAG2, ITGB6, ITGB3, IRS1, IRF6, AQP9, ITGA6, FOXK2, IL18, IL6R, IL4, FAS, IGFBP3, MCRIP1, IRGM, NANOS3, IDH2, IDH1, ID2, IRF8, RAB43, HTN1, HSP90AA1, HSPB2, BIRC2, HRG, HPGD, HOXD9, APBB1, HOXA9, HNRNPAB, NR4A1, HK2, HIP1, EHD2, ANXA5, H2AFZ, ANXA1, REPIN1, OLA1, CARD10, GSK3A, BRD7, TBK1, FHOD1, GRIN1, ANPEP, TUSC7, LAMA1, CAVIN1, GPI, GOLGA2, GLRX, GLS, EML4, GLO1, GLS2, AGO2, DKK3, BBC3, LYPD3, GJB2, AMHR2, GH1, GATA6, GATA1, GAPDH, SIN3A, LETMD1, BRMS1, ARMC8, TXN2, SPDEF, FSCN2, CBY1, CERS6, NR5A2, FSHR, IL27, ZMYND8, CCNDBP1, PADI4, MMD, SCRIB, SUZ12, NCSTN, ARHGEF12, NEDD4L, FMR1, EXOC7, FLT1, FLNA, KDM6B, PLXND1, PEG10, SNW1, ALDOB, CEP164, FKBP5, HLDA1, XRN2, FHL2, FHL1, SCUBE3, FCN2, ZEB1-AS1, FBP1, FASN, FBLN1, ALDH1A1, F3, F2RL2, F2, ETV1, ETS2, ETS1, ESRRB, ALAD, ERN1, ERF, EPHB3, EPHA8, EPHA4, EP300, ENO1, ENG, EMP3, FBXO45, RPL22L1, ELK3, ELK1, CYP4Z1, ELAVL1, EIF5A, EIF4G1, EIF4E, EIF2S1, RMST, EFNB2, EEF1D, EDNRA, ECT2, DVL2, AGTR1, DNMT3B, DDX5, DAPK1, CYP3A5, PEBP4, ZNF746, CYP1B1, CMTM8, CSPG4, VCAN, CSK, CSF2, CRP, CRMP1, FOXR2, CREBBP, ADM, KLF6, COL8A2, COL8A1, KLF17, CNTN1, MSI2, CCR6, CCR5, CLK2, LRG1, CKS2, BATF2, CTHRC1, CIRBP, MGLL, VSIG4, EGLN3, PKP3, RASSF1, FSTL1, PTP4A3, BVES, FOXN3, PIM2, EHD1, PPARGC1A, PGRMC1, HPSE, CCR9, MTHFD2, KDM5B, GNA13, LEFTY1, PDPN, CXCL13, FBLN5, CEACAM5, FST, MAD2L2, TAB1, RACK1, PAK4, CDKN1A, SPRY1, MSLN, PSME3, LINC01186, CDK3, G3BP1, TRAP1, CDH13, CDH11, NR1H3, MICA, OCLN, DNAJB6, MIR1181, CDH5, FRAT1, PDCD6IP, HDAC5, MIR124-2HG, MIR875, MIR888 |

**
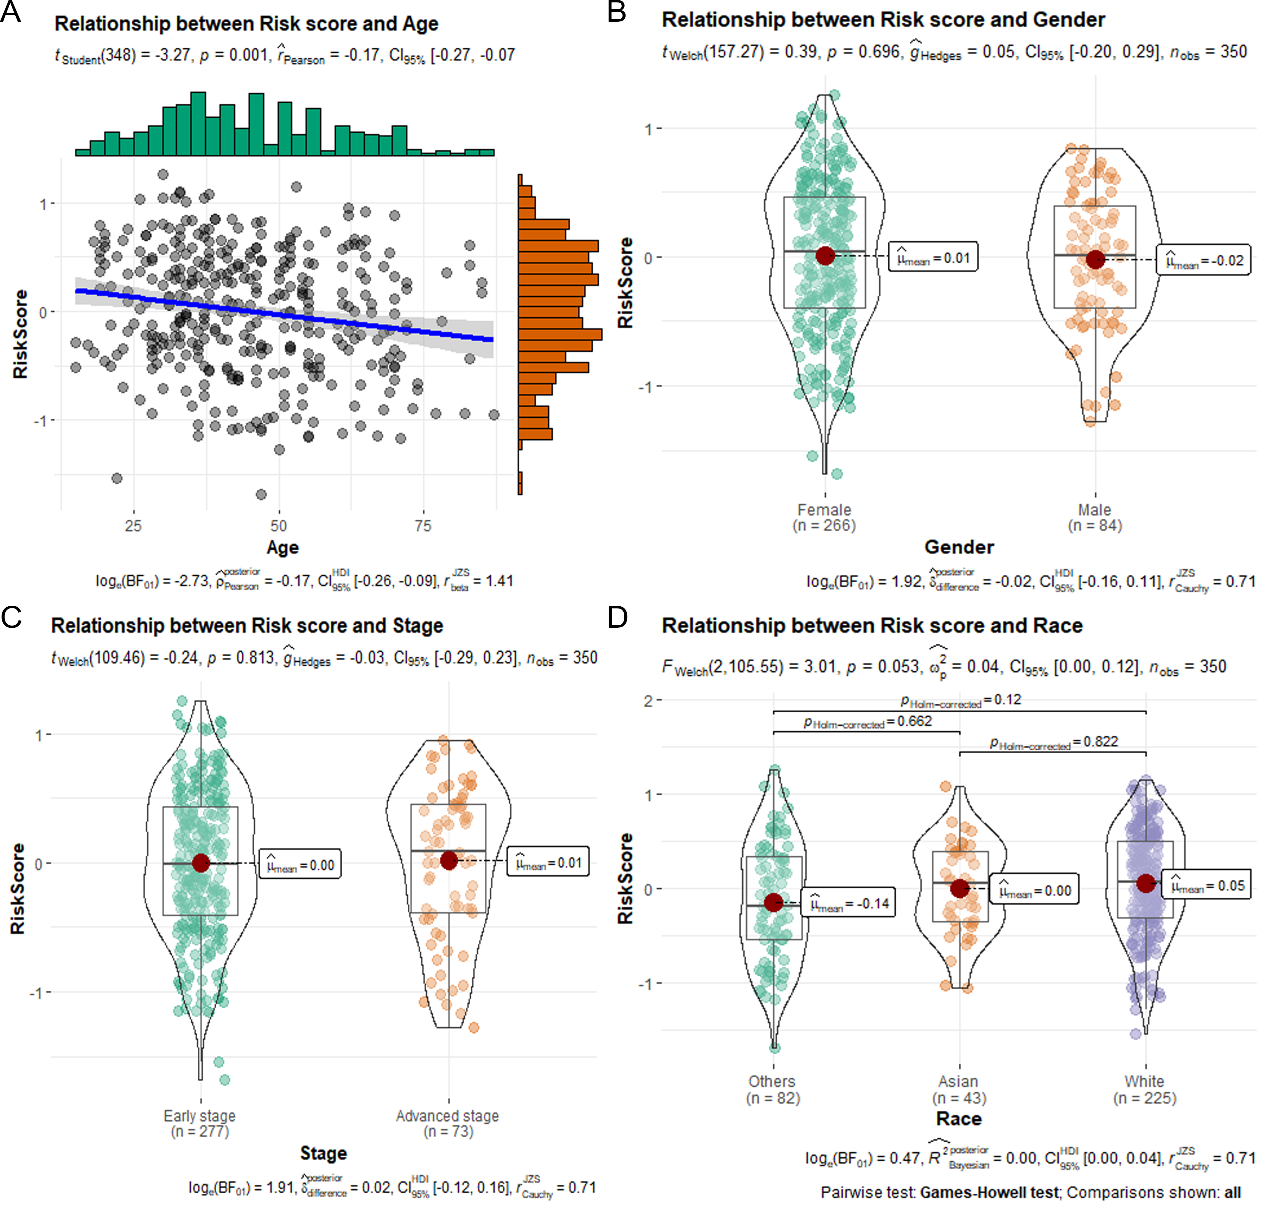
Figure S1. Correlation between risk score and clinical characteristics using TCGA-THCA dataset.** Correlation between risk score and (A) age, (B) gender, (C) stage, and (D) race.
